# Supplementary material for: SAPCD2 promotes neuroblastoma progression by altering the subcellular distribution of E2F7
Source: PubMed Central journal article supplement (PMC8866461; doi:10.1038/s41419-022-04624-z), 2022-02-23

**Figure 1B**

SH-SY5Y

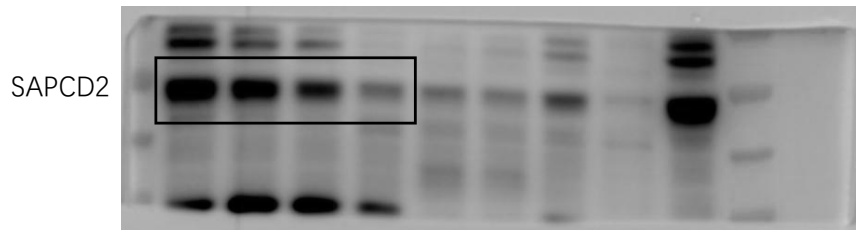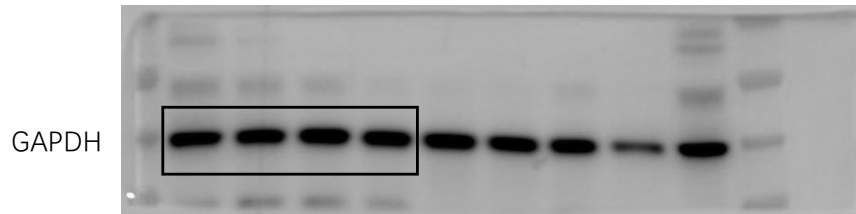

SK-N-BE(2)

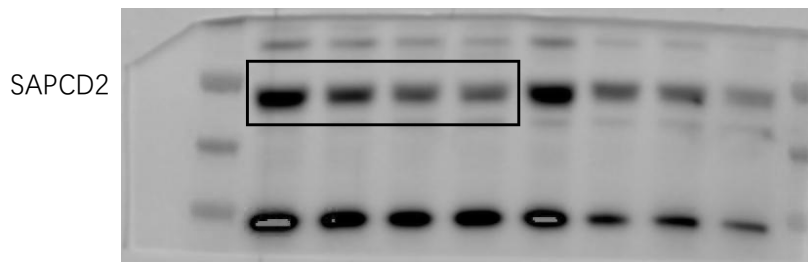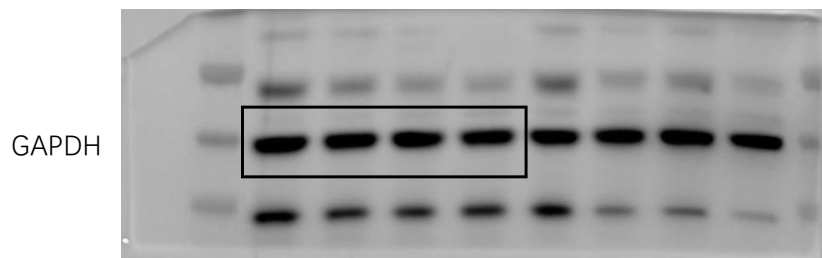

**Figure 2A**

SK-N-BE(2)

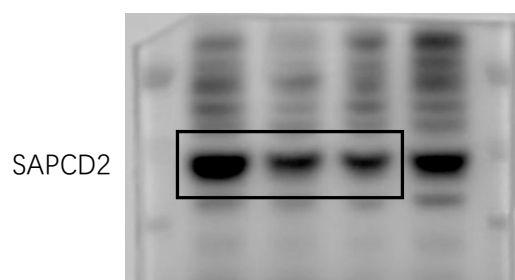

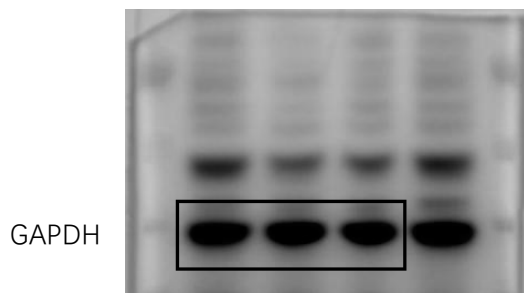

SH-SY5Y

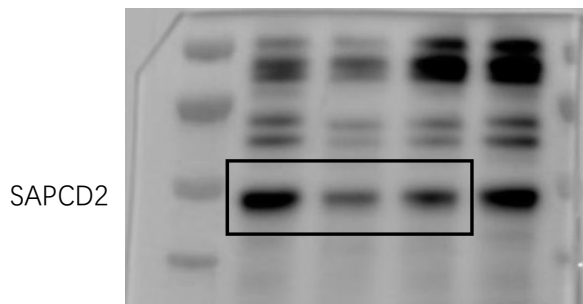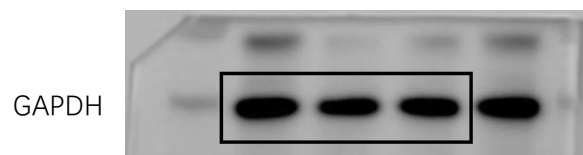

**Figure 2G**

SK-N-BE(2)

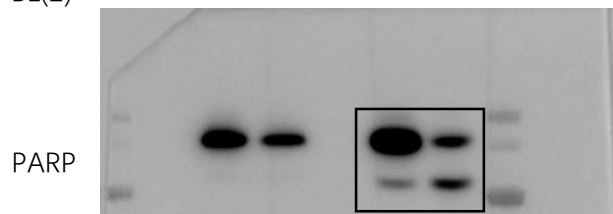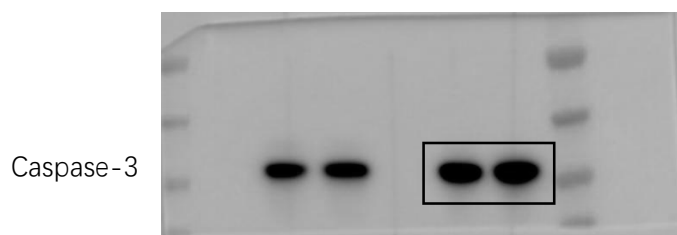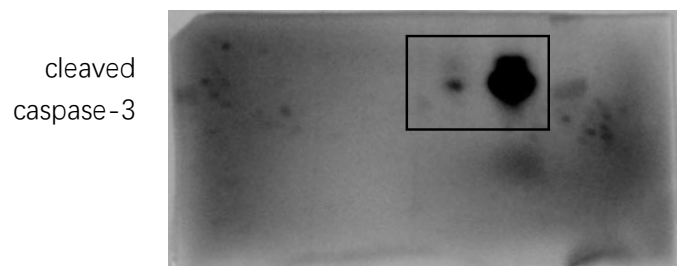

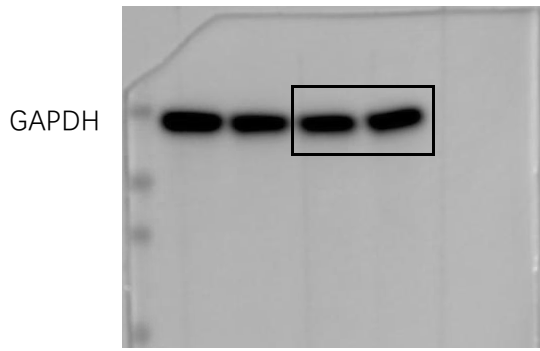

SH-SY5Y

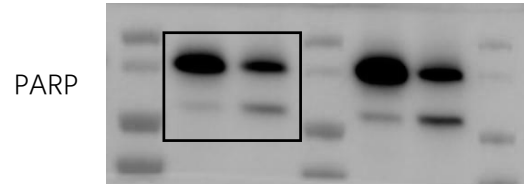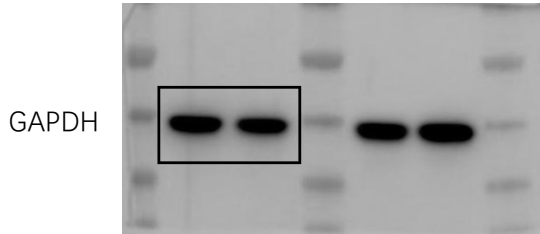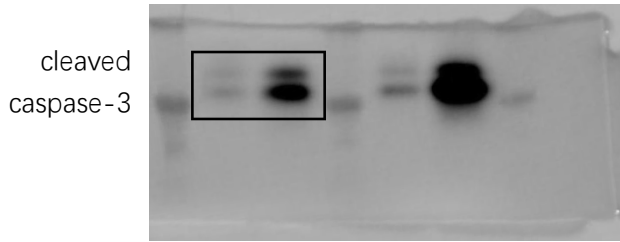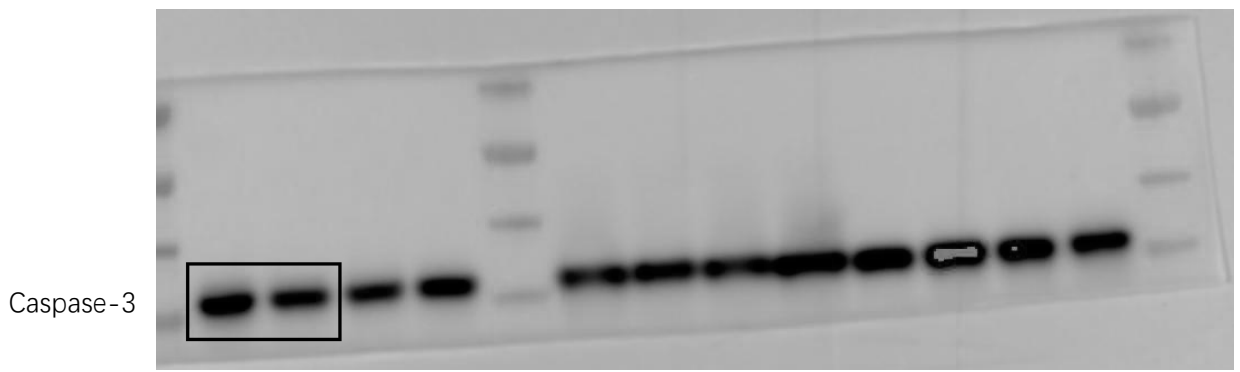

Figure 4B

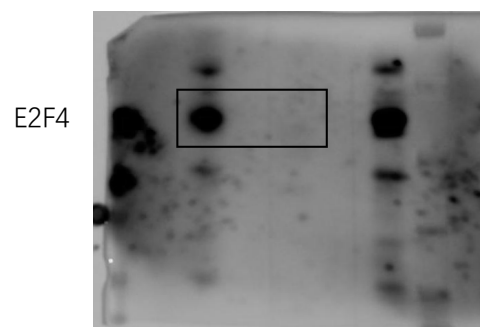

E2F7

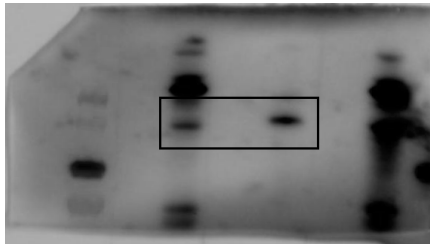

E2F1

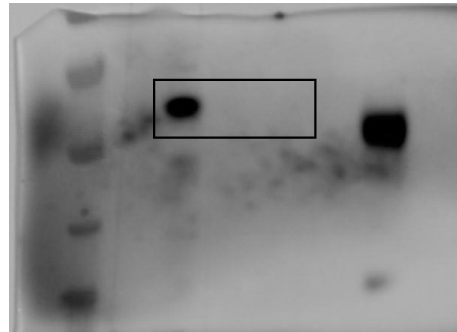

SAPCD2

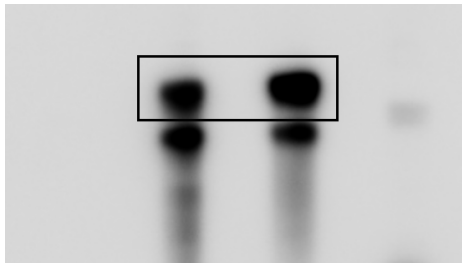

SAPCD2

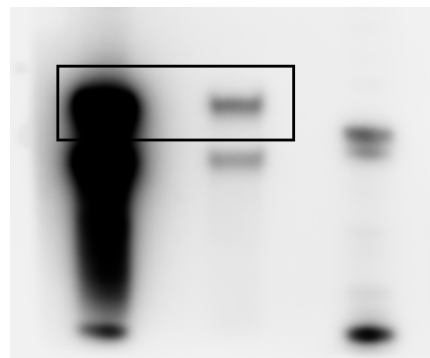

E2F7

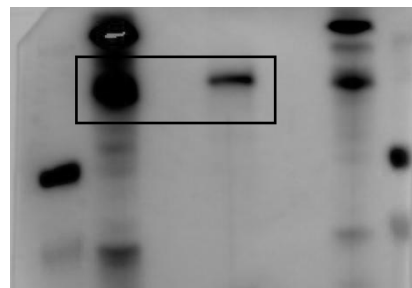

Figure 4E

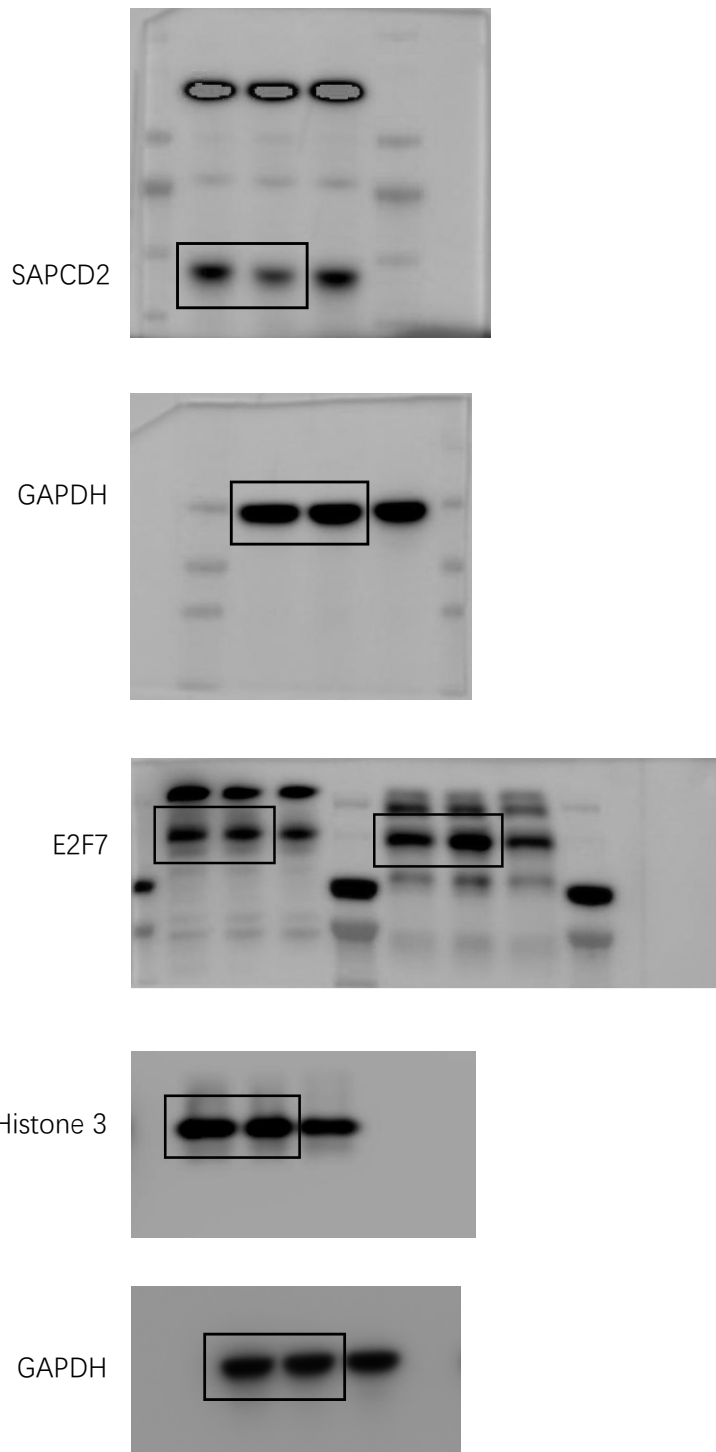

Supplement: 41419_2022_4624_MOESM10_ESM.pdf [file 41419_2022_4624_MOESM10_ESM.pdf]
