# Supplementary material for: SAPCD2 promotes neuroblastoma progression by altering the subcellular distribution of E2F7
Source: PubMed Central journal article supplement (PMC8866461; doi:10.1038/s41419-022-04624-z), 2022-02-23
Supplement: 41419_2022_4624_MOESM8_ESM.pdf [file 41419_2022_4624_MOESM8_ESM.pdf]

Supplementary Table 2 - Gene Set Enrichment Analysis (GSEA) with Hallmark signatures showed significant enrichment

| ID                           | setSize | enrichment | NES      | pvalue   | p.adjust | qvalues  | rank | leading_edge                   | core_enrichment                                                                                                                                                                                                                                                                                                                                                                                                                                                                                                                                                                                                                                                                                                                                                                                                |
|------------------------------|---------|------------|----------|----------|----------|----------|------|--------------------------------|----------------------------------------------------------------------------------------------------------------------------------------------------------------------------------------------------------------------------------------------------------------------------------------------------------------------------------------------------------------------------------------------------------------------------------------------------------------------------------------------------------------------------------------------------------------------------------------------------------------------------------------------------------------------------------------------------------------------------------------------------------------------------------------------------------------|
| HALLMARK_E2F_TARGETS         | 199     | -0.6911    | -3.2224  | 0.002915 | 0.008098 | 0.003069 | 2597 | tags=67%, list=19%, signal=55% | TIPIN/CTCF/CDKN3/ILF3/H2AZ1/SYNCRIP/DONSON/EZH2/CDC25A/ANP32E/MLH1/TACC3/DNMT1/RAD51C/RAN/RAD21/SPAG5/PRKDC/NUP153/RPA1/BRMS1L/WDR90/NCAPD2/CENPM/SRSF2/MSH2/NUP107/CTPS1/LMNB1/XPO1/ZW10/CNOT9/DEPDC1/UBE2T/SSRP1/PLK1/MCM2/NUP205/GINS3/CBX5/TUBB/SMC6/RFC1/NUDT21/S TAG1/CDCA3/MRE11/DCLRE1B/CSE1L/TMPO/CDC20/POLE/PSIP1/MELK/CCNB2/DIAPH3/TP53/POLD1/CKS1B/BIRC5/EXOSC8/USP1/KIF2C/RACGAP1/CHEK1/BUB1B/ESPL1/ING3/RPA3/HMGB3/NBN/BARD1/TRIP13/CDCA8/KIF22/PRIM2/NASP/HELLS/HMGB2/CHEK2/SPC24/PAN2/H2AX/UBR7/RAD51AP1/DEK/KIF18B/MCM6/MCM3/CDK1/DSCC1/RRM2/MYBL2/PTTG1/SMC4/MCM5/TIMELESS/MCM4/PCNA/AURKB/MM S22L/HMGA1/KIF4A/POLD3/PSMC3IP/TK1/SUV39H1/SPC25/RFC3/PLK4/DLGAP5/RFC2/ORC6/SMC1A/CIT/MKI67/POLA2/GINS1/TOP2A/SHMT1/CENPE/CDKN1A/MAD2L1/ASF1B/LIG1/TCF19/HMMR/DUT/ATAD2/BRCA1/GINS4/BRCA2/E2F8 |
| HALLMARK_G2M_CHECKPOINT      | 196     | -0.58345   | -2.71589 | 0.002865 | 0.008098 | 0.003069 | 3538 | tags=62%, list=26%, signal=47% | NUMA1/HNRNPU/CENPA/UBE2S/DBF4/ABL1/PAFAH1B1/KATNA1/HNRNPD/DKC1/E2F3/KIF23/CDC27/MEIS1/PRMT5/NEK2/SFPQ/SRSF1/PDS5B/STMN1/SRSF10/RPA2/T RA2B/INCCNP/CTCF/CDKN3/ILF3/ATF5/H2AZ1/ORC5/SYNCRIP/EZH2/CDC25A/TAC C3/SS18/MNAT1/RAD21/SMARCC1/CHAF1A/PBK/SRSF2/E2F1/NSD2/LMNB1/XPO1/UBE2C/PLK1/MCM2/CCNA2/BUB1/RAD54L/STAG1/TPX2/TMPO/MAP3K20/H2AZ2/C DC20/EFNA5/POLE/SNRPD1/CCNB2/CKS1B/PRC1/BIRC5/KIF2C/RACGAP1/CHEK1/T ROAP/ESPL1/POLQ/HMGB3/BARD1/KIF22/PRIM2/CCNF/FBXO5/MT2A/BUB3/NASP/EXO1/E2F2/CASP8AP2/H2AX/RBL1/MCM6/CENPF/MCM3/CDC7/CDK1/MYBL2/SMC 2/NDC80/PTTG1/SMC4/MCM5/AURKB/HMGA1/KIF4A/KIF11/TRAP1/NUSAP1/SUV39 H1/CDC45/PLK4/ORC6/NOTCH2/SMC1A/TTK/MKI67/GINS2/STIL/KNL1/POLA2/KIF2 0B/TOP2A/KIF15/CDC6/CENPE/HMGN2/MAD2L1/HMMR/BRCA2                                                                 |
| HALLMARK_MITOTIC_SPINDLE     | 196     | -0.39741   | -1.8499  | 0.002865 | 0.008098 | 0.003069 | 1866 | tags=28%, list=14%, signal=24% | ALMS1/LMNB1/SYNPO/HOOK3/PLK1/PCN1/ECT2/BUB1/RFC1/EPB41L2/TPX2/CENP J/TUBGCP5/PLEKHG2/CEP192/CCNB2/ARHGAP29/PRC1/BIRC5/ANLN/KIF2C/RACGA P1/ESPL1/ARHGAP10/KIF22/FBXO5/SASS6/LATS1/ITSN1/CENPF/CDK5RAP2/CDK1/ MYO1E/MID1/NDC80/PDLIM5/SMC4/SORBS2/KIF4A/KIF11/NUSAP1/DLGAP5/NOTC H2/SMC1A/TTK/KNTC1/KIF20B/TOP2A/KIF15/CENPE/WASF1/WASF2/BRCA2/CDC42 EP1                                                                                                                                                                                                                                                                                                                                                                                                                                                         |
| HALLMARK_SPERMATOGENESIS     | 83      | -0.36539   | -1.49297 | 0.01519  | 0.027614 | 0.010464 | 3660 | tags=52%, list=27%, signal=38% | SNAP91/CCT6B/PHF7/SIRT1/SPATA6/MLL10/CAMK4/DBF4/MLF1/CSNK2A2/VDAC3 /NEK2/COIL/MTOR/TSN/ZC3H14/IFT88/HSPA2/CDKN3/RPL39L/ARL4A/SCG3/ZC2H C1C/EZH2/PSMG1/AGFG1/IDE/BUB1/TOPBP1/CCNB2/KIF2C/RFC4/NPHP1/CHRM4/ CDK1/GRM8/TTK/DMC1/CCNA1/ACRBP/NCAPH/ACRV1/CNIH2                                                                                                                                                                                                                                                                                                                                                                                                                                                                                                                                                     |
| HALLMARK_DNA_REPAIR          | 144     | -0.31401   | -1.40799 | 0.007937 | 0.016534 | 0.006266 | 2106 | tags=30%, list=15%, signal=26% | RPA2/SUPT4H1/SNAPC5/ELOA/ERCC1/POLR2G/GTF2H3/FEN1/UMPS/ERCC8/RAD52 /NT5C3A/ERCC5/AK3/SRSF6/SSRP1/POLR3C/SF3A3/TK2/DBB2/POM121/NUDT21/A AAS/NELFB/TP53/POLD1/ADA/RPA3/TAF6/POLA1/RFC4/RFC5/ZWINT/RAD51/PCNA /POLD3/TYMS/RFC3/RFC2/ZNRD1/POLA2/LIG1/DUT/PRIM1                                                                                                                                                                                                                                                                                                                                                                                                                                                                                                                                                    |
| HALLMARK_MYC_TARGETS_V1      | 199     | -0.29997   | -1.39865 | 0.014577 | 0.027614 | 0.010464 | 3011 | tags=25%, list=22%, signal=20% | NPM1/XRCC6/HNRNPA2B1/SRSF3/SRSF1/HPRT1/MCM7/RNPS1/TRA2B/ILF2/IARS1/ H2AZ1/SYNCRIP/PRPS2/YWHAE/RAN/SMARCC1/SRSF2/CTPS1/NCBP1/XPO1/SET/M CM2/CCNA2/PRPF31/CDC20/SNRPD1/UBE2E1/UBA2/RRM1/USP1/HNRNPA3/GLO1/ BUB3/RFC4/DEK/SSB/MCM6/LSM2/SF3A1/MCM5/MCM4/LDHA/PCNA/TYMS/CDC45 /SRM/CDK2/MAD2L1/PRPF31/DUT/PRPF31                                                                                                                                                                                                                                                                                                                                                                                                                                                                                                   |
| HALLMARK_APICAL_JUNCTION     | 147     | 0.325837   | 1.38383  | 0.014263 | 0.027614 | 0.010464 | 4398 | tags=43%, list=32%, signal=29% | ICAM5/CDH15/MMP9/ITGA3/KCNH2/CNN2/CD276/ICAM2/VASP/PIK3CB/SIRPA/AT P1A3/NECTIN2/CDH4/STX4/RAC2/CLDN4/TRO/PIK3R3/NRXN2/ADAM15/COL16A1/ HRAS/PBX2/CADM2/AV2/MMP2/MDK/SDC3/ARHGFE6/CD99/ACTN2/SLC30A3/AD AM9/PARD6G/PCDH1/NLGN2/TAOK2/SORBS3/CLDN18/PLCG1/CDH3/YWHAH/TSP AN4/SPEG/BMP1/PKD1/PFN1/THY1/THBS3/GNAI1/ITGA2/SRC/RAN/INSIG1/LAYN/ BAIAP2/MAP4K2/SYMPK/PTPRC/SHC1/ITGB1/MADCAM1                                                                                                                                                                                                                                                                                                                                                                                                                         |
| HALLMARK_ALLOGRAFT_REJECTION | 94      | 0.362396   | 1.435062 | 0.015464 | 0.027614 | 0.010464 | 2800 | tags=29%, list=21%, signal=23% | RPL3L/ZAP70/MMP9/CD4/TAP2/CD40/CTSS/CFP/RPS9/HLA- A/PSMB10/IL12A/ST8SIA4/CSK/GALNT1/BCL3/IL2RB/CCND3/FAS/INHBA/B2M/F2R/T APBP/EIF4G3/CDKN2A/RPS19/AKT1                                                                                                                                                                                                                                                                                                                                                                                                                                                                                                                                                                                                                                                         |
| HALLMARK_MTORC1_SIGNALING    | 192     | 0.325262   | 1.438292 | 0.006154 | 0.013891 | 0.005264 | 2245 | tags=24%, list=16%, signal=20% | STC1/SLC7A11/POLR3G/BTG2/TUBA4A/CTH/EGLN3/CSQSTM1/CFP/HK2/EDEM1/TRIB 3/G6PD/GLRX/TE5/XBP1/DDIT3/MAP2K3/IFI30/SLC9A3R1/SLC6A6/SLC7A5/MLL11/ NFKB1B/SLC1A5/FKBP2/RIT1/SDF2L1/SLC2A3/PIK3R3/CXCR4/IFITM1/PPP1R15A/CCNG 1/BHLHE40/UFM1/SERP1/SERPINH1/GCLC/HSPA5/M6PR/ATP2A2/RAB1A/USO1/DDI T4/SSR1                                                                                                                                                                                                                                                                                                                                                                                                                                                                                                                |

|                                    |     |          |          |          |          |          |      |                                |                                                                                                                                                                                                                                                                                                                                                                                                                                                                                                                                                                                                                                              |
|------------------------------------|-----|----------|----------|----------|----------|----------|------|--------------------------------|----------------------------------------------------------------------------------------------------------------------------------------------------------------------------------------------------------------------------------------------------------------------------------------------------------------------------------------------------------------------------------------------------------------------------------------------------------------------------------------------------------------------------------------------------------------------------------------------------------------------------------------------|
| HALLMARK_COMPLEMENT                | 126 | 0.353146 | 1.465091 | 0.00639  | 0.013891 | 0.005264 | 2746 | tags=33%, list=20%, signal=27% | MAFF/C1S/MMP14/CTSS/MMP15/CASP4/CEBPB/CASP9/HPCAL4/EHD1/CLU/CTSD/LIPA/PRKCD/PRSS3/LRP1/DGKG/DOCK4/CDK5R1/RCE1/STX4/COL4A2/ANG/CTSL/CTSB/CALM3/CASP7/LAP3/HSPA1A/PPP4C/HSPA5/APOC1/PRCP/SPOCK2/CASP3/DYRK2/ACTN2/ADAM9/PDP1/IRF2/PLAT/CD46                                                                                                                                                                                                                                                                                                                                                                                                    |
| HALLMARK_XENOBIOTIC_METABOLISM     | 141 | 0.349921 | 1.466684 | 0.004934 | 0.011748 | 0.004452 | 3555 | tags=38%, list=26%, signal=28% | AKR1C3/CYP1A1/APOE/ABCC3/GSTA3/UPP1/ABCC2/GABARAPL1/ASL/EPHA2/DDA H2/SPINT2/PSMB10/FAH/BLVRB/HES6/SLC6A6/FBP1/SLC1A5/CBR1/PAPSS2/CROT/COMT/DCXR/SLC12A4/AKR1C2/NINJ1/SMOX/ACO2/ALDH2/TMEM176B/ACOX3/NQO1/ARG2/GCLC/ATP2A2/DHRS7/FAS/CYP2J2/MAN1A1/IDH1/GCNT2/PTGES/POR/CYP2E1/CYP27A1/PEMT/TMBIM6/DDIT1/IL1R1/CNDP2/GSR/TPST1                                                                                                                                                                                                                                                                                                                |
| HALLMARK_HEME_METABOLISM           | 161 | 0.34668  | 1.493042 | 0.004769 | 0.011748 | 0.004452 | 2669 | tags=27%, list=20%, signal=22% | ACP5/P4HA2/SLC7A11/FTCD/BTG2/SLC6A8/PPP2R5B/SLC30A1/ANK1/ALDH1L1/MA P2K3/TMEM9B/BLVRB/CLCN3/BMP2K/GLRX5/BACH1/DAAM1/SLC11A2/ABC6/KLF3/CTSB/SMOX/CDR2/ACSL6/TFRC/HTATIP2/RCL1/SLC25A38/CPOX/ADIPOR1/CCND3/RNF19A/GCLC/FN3K/MARCHF2/ENDOD1/MINPP1/TNRC6B/HTRA2/SNCA/AGPAT4/HAGH/ATP6V0A1                                                                                                                                                                                                                                                                                                                                                       |
| HALLMARK_OXIDATIVE_PHOSPHORYLATION | 198 | 0.337291 | 1.500489 | 0.001522 | 0.005659 | 0.002145 | 5116 | tags=47%, list=37%, signal=30% | NDUFA3/ATP6V0E1/ATP6V0B/SLC25A20/ATP6A1/COX10/MRPL34/TIMM17A/VDA C1/ATP6V1F/ATP6V0C/PDHX/GPX4/POLR2F/SLC25A6/HCCS/ACO2/TIMM13/CASP7/NDUFA1/GRPEL1/MRPS12/ATP6V1G1/BAX/UQCRRF1/ECHS1/OAT/PMPCA/NDUFB2/ACADVL/HTRA2/NQO2/TIMM8B/HSD17B10/ACAA1/ATP1B1/SLC25A4/CPT1A/PDP1/NDUFB8/ATP6V1H/IDH1/UQCRR1/OXA1L/POR/NDUFA2/ISCU/ATP5ME/HSPA9/TI MM10/ETFB/RHOT2/RHOT1/ATP5MC3/SLC25A3/CYC1/IDH3A/TCIRG1/AFG3L2/ATP6V1C1/ALDH6A1/ATP6V1E1/COX5A/ATP5F1D/ETFA/SLC25A12/NDUFS6/TIMM50/C YCS/MDH2/ACAT1/COX5B/MPC1/SUCLA2/ATP5MF/COX7A2/MRPL15/LDHB/NDUF AB1/COX17/NDUFB7/NDUFC2/NDUFA7/NDUFB1/AIFM1/DLD/COX6A1/NDUFV1/N DUFAB/COX6B1/ACAA2/MFN2/ATP5F1A |
| HALLMARK_UNFOLDED_PROTEIN_RESPONSE | 112 | 0.376345 | 1.535984 | 0.003333 | 0.008772 | 0.003324 | 3875 | tags=40%, list=28%, signal=29% | WIPI1/DNAJB9/KDEL3/HERPUD1/PDIA5/EDEM1/SRPR/CEBPB/XBP1/BAG3/TSPYL2/ATF3/ARFGAP1/SLC7A5/EXOSC4/SLC30A5/CHAC1/VEGFA/ERN1/EXOSC5/SERP1/YI F1A/HSPA5/ALDH18A1/NABP1/DDIT4/SSR1/TUBB2A/EEF2/PREB/EIF4G1/WFS1/ATP6 V0D1/NHP2/HSPA9/DNAJC3/DNAJA4/RRP9/IMP3/EXOC2/EIF4A2/PSAT1/SEC31A/G OSR2/XPOT                                                                                                                                                                                                                                                                                                                                                   |
| HALLMARK_ESTROGEN_RESPONSE_EARLY   | 148 | 0.360847 | 1.536196 | 0.001582 | 0.005659 | 0.002145 | 2495 | tags=31%, list=18%, signal=26% | HSPB8/DHRS2/DEPTOR/CISH/FOS/IGF1R/KRT19/RET/FAM102A/XBP1/BLVRB/PLAAT 3/SLC9A3R1/MREG/SLC7A5/NBL1/HES1/PAPSS2/MLPH/TTC39A/ALDH3B1/TPBG/TIA M1/RAB31/CCND1/KAZN/OLFML3/RRP12/MYBBP1A/MAPT/TOB1/CA12/RPS6KA2/B HLHE40/UNC119/SLC19A2/RARA/SCARB1/ENDOD1/TSKU/LRIG1/PIPF/UGCG/SLC22 A5/SLC39A6/ABHD2                                                                                                                                                                                                                                                                                                                                             |
| HALLMARK_GLYCOLYSIS                | 175 | 0.360617 | 1.578898 | 0.001572 | 0.005659 | 0.002145 | 2438 | tags=29%, list=18%, signal=24% | IER3/STC1/P4HA2/KDEL3/CHPF2/CTH/COL5A1/ISG20/EGLN3/HK2/PGAM2/IRS2/C HST1/G6PD/GLRX/GFPT1/QSOX1/TSTA3/NOL3/CACNA1H/PM2/EFNA3/RRAGD/SL C16A3/TPBG/PFKP/ANG/PYGL/NT5E/CHPF/IDUA/ABC6/VEGFA/DYSL4/HS6ST2/C OPB2/CXCR4/MERTK/IL13RA1/PLOD1/ADORA2B/GCLC/GNE/HSPA5/DDIT4/SDC3/A LG1/GMPA/B3GAT3/B4GALT4                                                                                                                                                                                                                                                                                                                                            |
| HALLMARK_UV_RESPONSE_UP            | 130 | 0.39778  | 1.647139 | 0.001631 | 0.005659 | 0.002145 | 2655 | tags=36%, list=19%, signal=29% | CYP1A1/MMP14/BTG2/TUBA4A/KCNH2/SLC6A8/FOS/SQSTM1/RET/CLCN2/TYRO3/ NAT1/TST/CDKN1C/RHOB/ATF3/IGFBP2/GRINA/PRKCD/MSX1/JUNB/ABC1/SELEN OW/FURIN/ATP6V1F/CD34/NR4A1/NPTX2/SPR/E2F5/GLS/TFRC/CHKA/GRPEL1/CL TB/MGAT1/CCND3/PPP1R2/DLG4/BCL2L11/GPX3/CYB5R1/PIPF/CASP3/BAK1/ACAA 1/SLC25A4                                                                                                                                                                                                                                                                                                                                                         |
| HALLMARK_IL2_STAT5_SIGNALING       | 143 | 0.391695 | 1.655607 | 0.001605 | 0.005659 | 0.002145 | 2434 | tags=32%, list=18%, signal=27% | MAFF/IFITM3/RGS16/SYNGR2/CISH/GADD45B/COL6A1/GABARAPL1/IGF1R/SPRY4/ HK2/TNFRSF1B/XBP1/ST3GAL4/RNH1/FAH/PTGER2/CDKN1C/RHOB/NRP1/KLF6/SYT 11/ETV4/SLC1A5/TTC39B/RRAGD/ABC1/FURIN/TIAM1/NT5E/GPX4/SLC2A3/ALCA M/IGF2R/TNFRSF21/BHLHE40/IL2RB/CCND3/ODC1/PLEC/CKAP4/PUS1/LRIG1/ITGA6 /APLP1/CASP3                                                                                                                                                                                                                                                                                                                                                |
| HALLMARK_APOPTOSIS                 | 131 | 0.407468 | 1.690342 | 0.001623 | 0.005659 | 0.002145 | 3963 | tags=54%, list=29%, signal=39% | IER3/TNFRSF12A/IFITM3/BTG2/GADD45B/PPP2R5B/CTH/ISG20/SQSTM1/CD14/CAS P4/AIFM3/SMAD7/DDIT3/CASP9/NEFH/RHOB/ATF3/GADD45A/BCL2L2/CLU/TSPO/ NEDD9/JUN/GPX4/CCND1/RNASEL/IGF2R/CASP7/CAV1/GPX1/RARA/BAX/MMP2/DI ABLO/BCL2L11/GPX3/IGFBP6/XIAP/FAS/DFFA/CASP3/F2R/FEZ1/PLAT/RELA/MCL1/E NO2/SAT1/TGFB3/DAP3/CDKN1B/DNAJC3/TIMP1/APP/SC5D/RHOT2/PEA15/GSR/ ROCK1/LMNA/TXNIP/GSN/HMOX1/ETF1/IFNGR1/PLPPR4/PSEN2/SPTAN1/PDGFRB/ GSTM1                                                                                                                                                                                                                 |

|                                    |     |          |          |          |          |          |      |                                |                                                                                                                                                                                                                                                                                                                                                                             |
|------------------------------------|-----|----------|----------|----------|----------|----------|------|--------------------------------|-----------------------------------------------------------------------------------------------------------------------------------------------------------------------------------------------------------------------------------------------------------------------------------------------------------------------------------------------------------------------------|
| HALLMARK_INTERFERON_GAMMA_RESPONSE | 127 | 0.411322 | 1.703154 | 0.001626 | 0.005659 | 0.002145 | 2535 | tags=31%, list=19%, signal=26% | ISG15/PSMB8/IFITM2/BST2/C1S/IFITM3/CD40/UPP1/ISG20/CMKLR1/CASP4/HELZ2/MVP/HLA-A/PSMB10/IFI30/OGFR/LYSMD2/ST8SIA4/PELI1/ARID5B/VAMP5/PFKP/LY6E/CIITA/P SME2/CASP7/HLA-B/LAP3/IL2RB/RNF31/STAT3/IRF9/ST3GAL5/PSME1/NLRC5/FAS/CASP3/B2M/TAPBP                                                                                                                                  |
| HALLMARK_INFLAMMATORY_RESPONSE     | 92  | 0.430141 | 1.70341  | 0.001695 | 0.005659 | 0.002145 | 2919 | tags=37%, list=21%, signal=29% | BST2/TNFSF9/ABCA1/RGS16/MMP14/BTG2/CD40/CMKLR1/CD14/TNFRSF1B/OSMR/ITGB8/PTGER2/SPHK1/KLF6/BEST1/TPBG/SELENOS/SLC31A1/SLC11A2/LY6E/DCBLD 2/IL2RB/PVR/PTGIR/ADORA2B/GABBR1/ATP2A2/INHBA/TAPBP/ADRM1/RELA/CD55 /HBEGF                                                                                                                                                          |
| HALLMARK_ADIPOGENESIS              | 176 | 0.391482 | 1.717347 | 0.00156  | 0.005659 | 0.002145 | 2884 | tags=32%, list=21%, signal=25% | HSPB8/SQOR/APOE/SPARCL1/ABCA1/DNAJB9/ESRRA/NKIRAS1/CD151/RNF11/TST/SLC27A1/FAH/BCL6/GADD45A/CHCHD10/LIPE/SLC1A5/SLC25A1/CMPK1/MGLL/GP X4/LIFR/ACO2/ALDH2/ENPP2/PIM3/TOB1/GRPEL1/PPP1R15B/RMDN3/MYLK/YWHA G/STOM/SCARB1/SORBS1/GPAT4/ADCY6/VEGFB/NABP1/ECHS1/SOWAHC/DHR57/ GPX3/G3BP2/PTGER3/PREB/MIGA2/AGPAT3/PFKFB3/ESYT1/IDH1/UQCR11/ALDOA/ POR/PGM1                      |
| HALLMARK_MYOGENESIS                | 128 | 0.429621 | 1.774715 | 0.001637 | 0.005659 | 0.002145 | 2312 | tags=32%, list=17%, signal=27% | HSPB8/ADAM12/KLF5/SYNGR2/KCNH2/SLC6A8/GADD45B/MYH8/PGAM2/KIF3/CO L6A3/PKIA/BIN1/PYGM/BDKRB2/COL6A2/SPHK1/CLU/PTGIS/CACNA1H/ATP6AP1/RI T1/COL4A2/AEBP1/SMTN/MAPRE3/SPARC/TCAP/SH3BGR/LSP1/BHLHE40/MYLK/ITG B5/NQO1/SORBS1/IGFBP7/TAGLN/SIRT2/TPM2/MYL6B/GPX3                                                                                                                 |
| HALLMARK_INTERFERON_ALPHA_RESPONSE | 69  | 0.469101 | 1.78261  | 0.001698 | 0.005659 | 0.002145 | 3221 | tags=36%, list=24%, signal=28% | ISG15/PSMB8/IFITM2/BST2/C1S/HLA-C/IFITM3/ISG20/HELZ2/IFI30/OGFR/LY6E/PSME2/LAP3/RNF31/IRF9/PSME1/PROCR/ B2M/IRF2/IFIT3/NCOA7/TRIM25/LGALS3BP/GMPR                                                                                                                                                                                                                           |
| HALLMARK_KRAS_SIGNALING_UP         | 114 | 0.462171 | 1.884924 | 0.001675 | 0.005659 | 0.002145 | 1787 | tags=29%, list=13%, signal=25% | PSMB8/PCSK1N/MMP9/SPARCL1/RGS16/YRDC/GADD45G/ALDH1A3/CTSS/CMKLR1 /MAFB/CAB39L/TNFRSF1B/KIF5C/ENG/GLRX/SPRY2/FUCA1/NRP1/MYCN/ETV4/MM P11/IGF2/ABCB1/CROT/SCG5/KCNN4/DCBLD2/CXCR4/PPP1R15A/TMEM176B/LAT2/ MAP3K1                                                                                                                                                              |
| HALLMARK_HYPOXIA                   | 166 | 0.442195 | 1.915511 | 0.001582 | 0.005659 | 0.002145 | 1793 | tags=30%, list=13%, signal=26% | TGFB3/IER3/STC1/MAFF/P4HA2/ZFP36/KDEL3/FOS/COL5A1/ISG20/GCK/HK2/PGA M2/IRS2/CHST3/PRDX5/GLRX/TEB/DUSP1/DDIT3/STBD1/PYGM/CDKN1C/EFNA1/PG F/ATF3/TPST2/SLC6A6/KLF6/FBP1/EFNA3/RRAGD/SLC25A1/NCAN/NAGK/JMJD6/JU N/TPBG/PFKP/VEGFA/SLC2A3/DPYSL4/CXCR4/ALDOC/PPP1R15A/CA12/BHLHE40/M AP3K1/CAV1                                                                                 |
| HALLMARK_P53_PATHWAY               | 160 | 0.465649 | 2.002543 | 0.00159  | 0.005659 | 0.002145 | 2618 | tags=38%, list=19%, signal=31% | OSGIN1/IER3/TNFSF9/SLC7A11/PLK2/RGS16/BTG2/FOS/UPP1/MKNK2/PLK3/TRIB3/E PHA2/DDIT3/IFI30/TSPYL2/DEF6/TRAF4/SLC3A2/ATF3/FUCA1/GADD45A/SPHK1/CT SD/CEBPA/AEN/MXD4/MAPKAPK3/BLCAP/CDK5R1/DCXR/JUN/H2AW/NINJ1/SEC61 A1/FBXW7/RNF19B/DRAM1/PPP1R15A/TOB1/CCNG1/HRAS/WWP1/RPL18/SLC19A2 /STOM/TRIAP1/JAG2/ABCC5/CCND3/BAX/RHBD2/DDIT4/FAS/PROCR/COQ8A/HEX IM1/F2R/RPL36/BAK1/HINT1 |
| HALLMARK_TNFA_SIGNALING_VIA_NFKB   | 140 | 0.533464 | 2.240042 | 0.001623 | 0.005659 | 0.002145 | 1652 | tags=38%, list=12%, signal=34% | IER3/FOSL1/PHLDA2/MAFF/TNFSF9/ZFP36/ABCA1/PLK2/SIK1/YRDC/BTG2/SGK1/FO S/GADD45B/MSK/SQSTM1/IRS2/FJX1/PER1/CEBPB/DUSP1/MAP2K3/RELB/TNC/RHO B/EFNA1/ATF3/BCL6/EHD1/KLF9/GADD45A/SPHK1/DUSP4/KLF6/KDM6B/SERPINB8/ JUNB/DNAJB4/HES1/FUT4/JUN/IER2/NR4A1/NINJ1/VEGFA/SLC2A3/CCND1/RNF19B /SPSB1/BCL3/DRAM1/SLC16A6/PPP1R15A                                                      |
